# Supplementary material for: Acquired resistance to PI3K/mTOR inhibition is associated with mitochondrial DNA mutation and glycolysis
Source: PubMed Central journal article supplement (PMC5746370; doi:10.18632/oncotarget.22655), 2017-11-24
Supplement: oncotarget-08-110133-s001.pdf [file oncotarget-08-110133-s001.pdf]

# Acquired resistance to PI3K/mTOR inhibition is associated with mitochondrial DNA mutation and glycolysis

## SUPPLEMENTARY MATERIALS

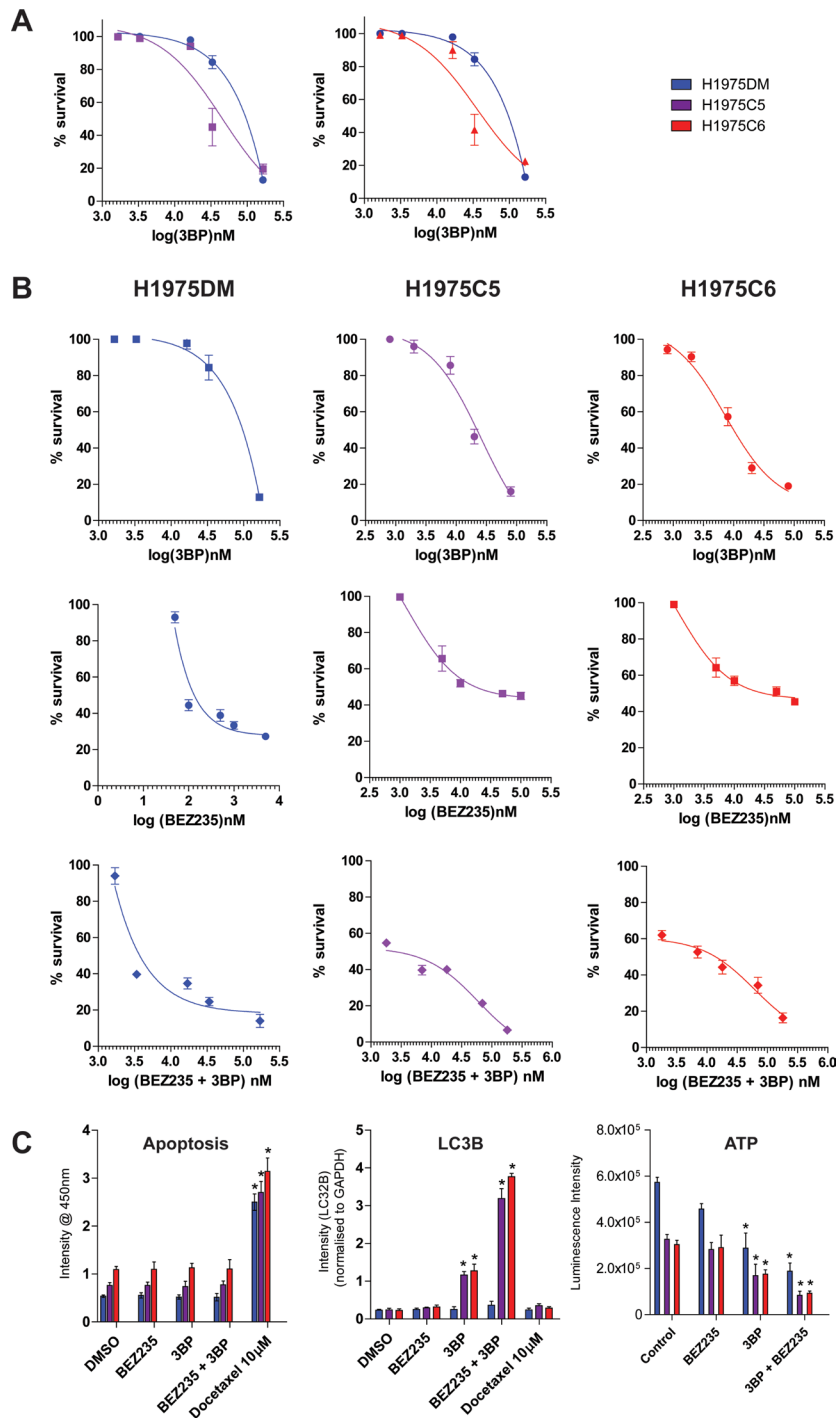

**Supplementary Figure 1: Effect of treatment with BEZ235 alone, 3-bromopyruvate (3BP) alone, and 3BP and BEZ235 in combination in H1975DM, H1975C5, and H1975C6 cell lines. (A)** Concentration response curves of 3BP. **(B)** Concentration response curves for 3BP (upper panels), BEZ235 (middle panels) and the fixed-ratio combination of BEZ235 and 3BP (lower panels). **(C)** Apoptosis, LC3B and ATP levels 24h post-exposure to IC<sub>50</sub> concentrations of BEZ235, 3BP or their combination. \**p* < 0.05 to levels in control-treated cells for each cell line, paired *t*-test.

**Supplementary Table 1: Gene expression levels and differences according to genome-wide gene expression array analysis. See Supplementary\_Table\_1**

**Supplementary Table 2: Mitochondrial DNA variants detected by next generation sequencing of mitochondrial DNA, according to their reported and predicted effects, and presence in H1975DM, H1975C5, and H1975C6 cells. See Supplementary\_Table\_2**
